# Supplementary material
Source: PubMed Central journal article supplement (PMC9050924)
Supplement: NIHMS1790465-supplement-8.pdf [file NIHMS1790465-supplement-8.pdf]

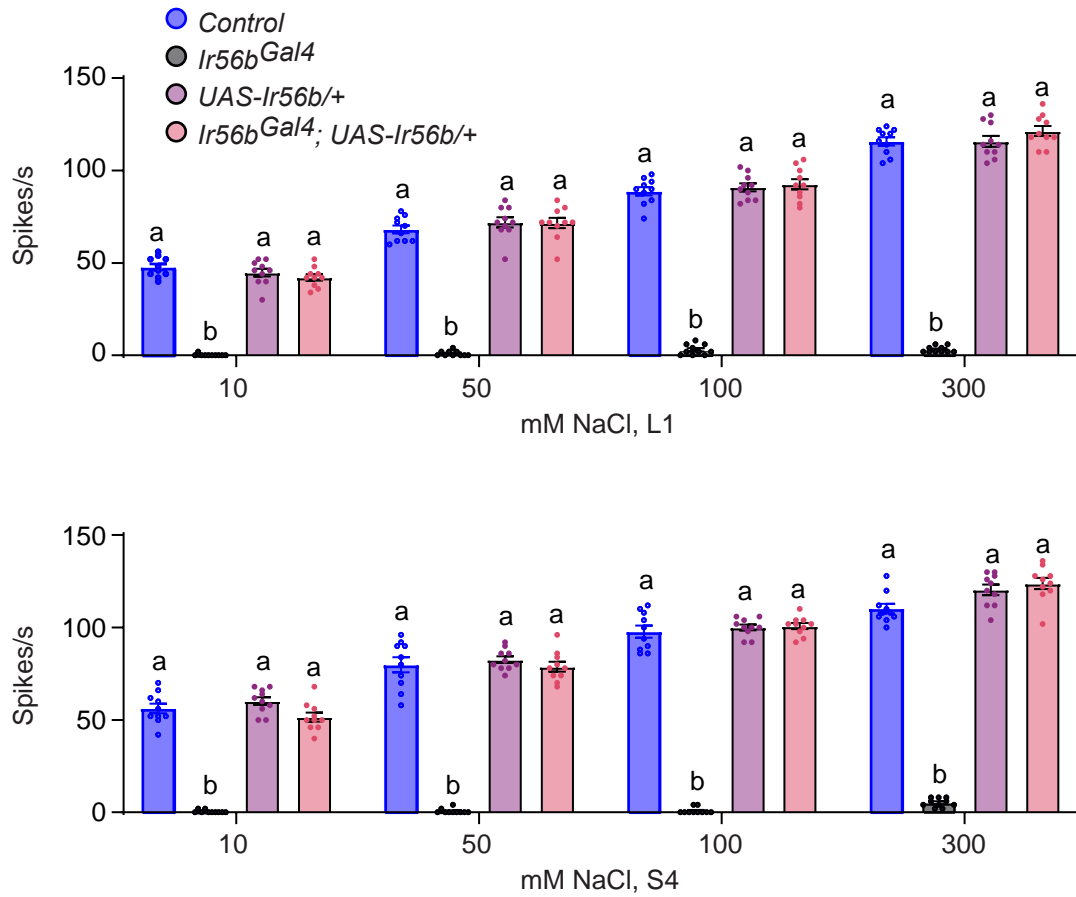

**Figure S1. Rescue of the salt response phenotype of *Ir56bGal4* by *Ir56b*. Related to Figure 2.** When an *Ir56bGal4* driver was used to drive a *UAS-Ir56b* transgene, it rescued the *Ir56bGal4* mutant phenotype, in both L1 and S4 sensilla. One-way ANOVA followed by Tukey's multiple comparison test; n = 10. Values indicated with different letters are significantly different.

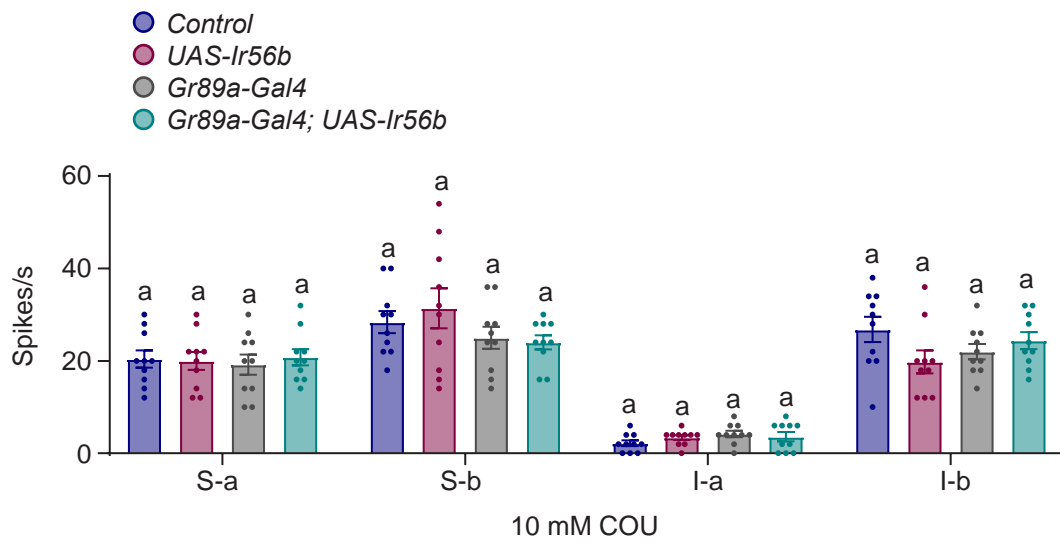

**Figure S2. Normal responses to a bitter compound in neurons ectopically expressing *Ir56b*.**

**Related to Figure 3.**

Responses of the indicated classes of bitter neurons in the indicated genotypes to 10 mM coumarin, a bitter compound. One-way ANOVA followed by Tukey's multiple comparison test; n = 5.

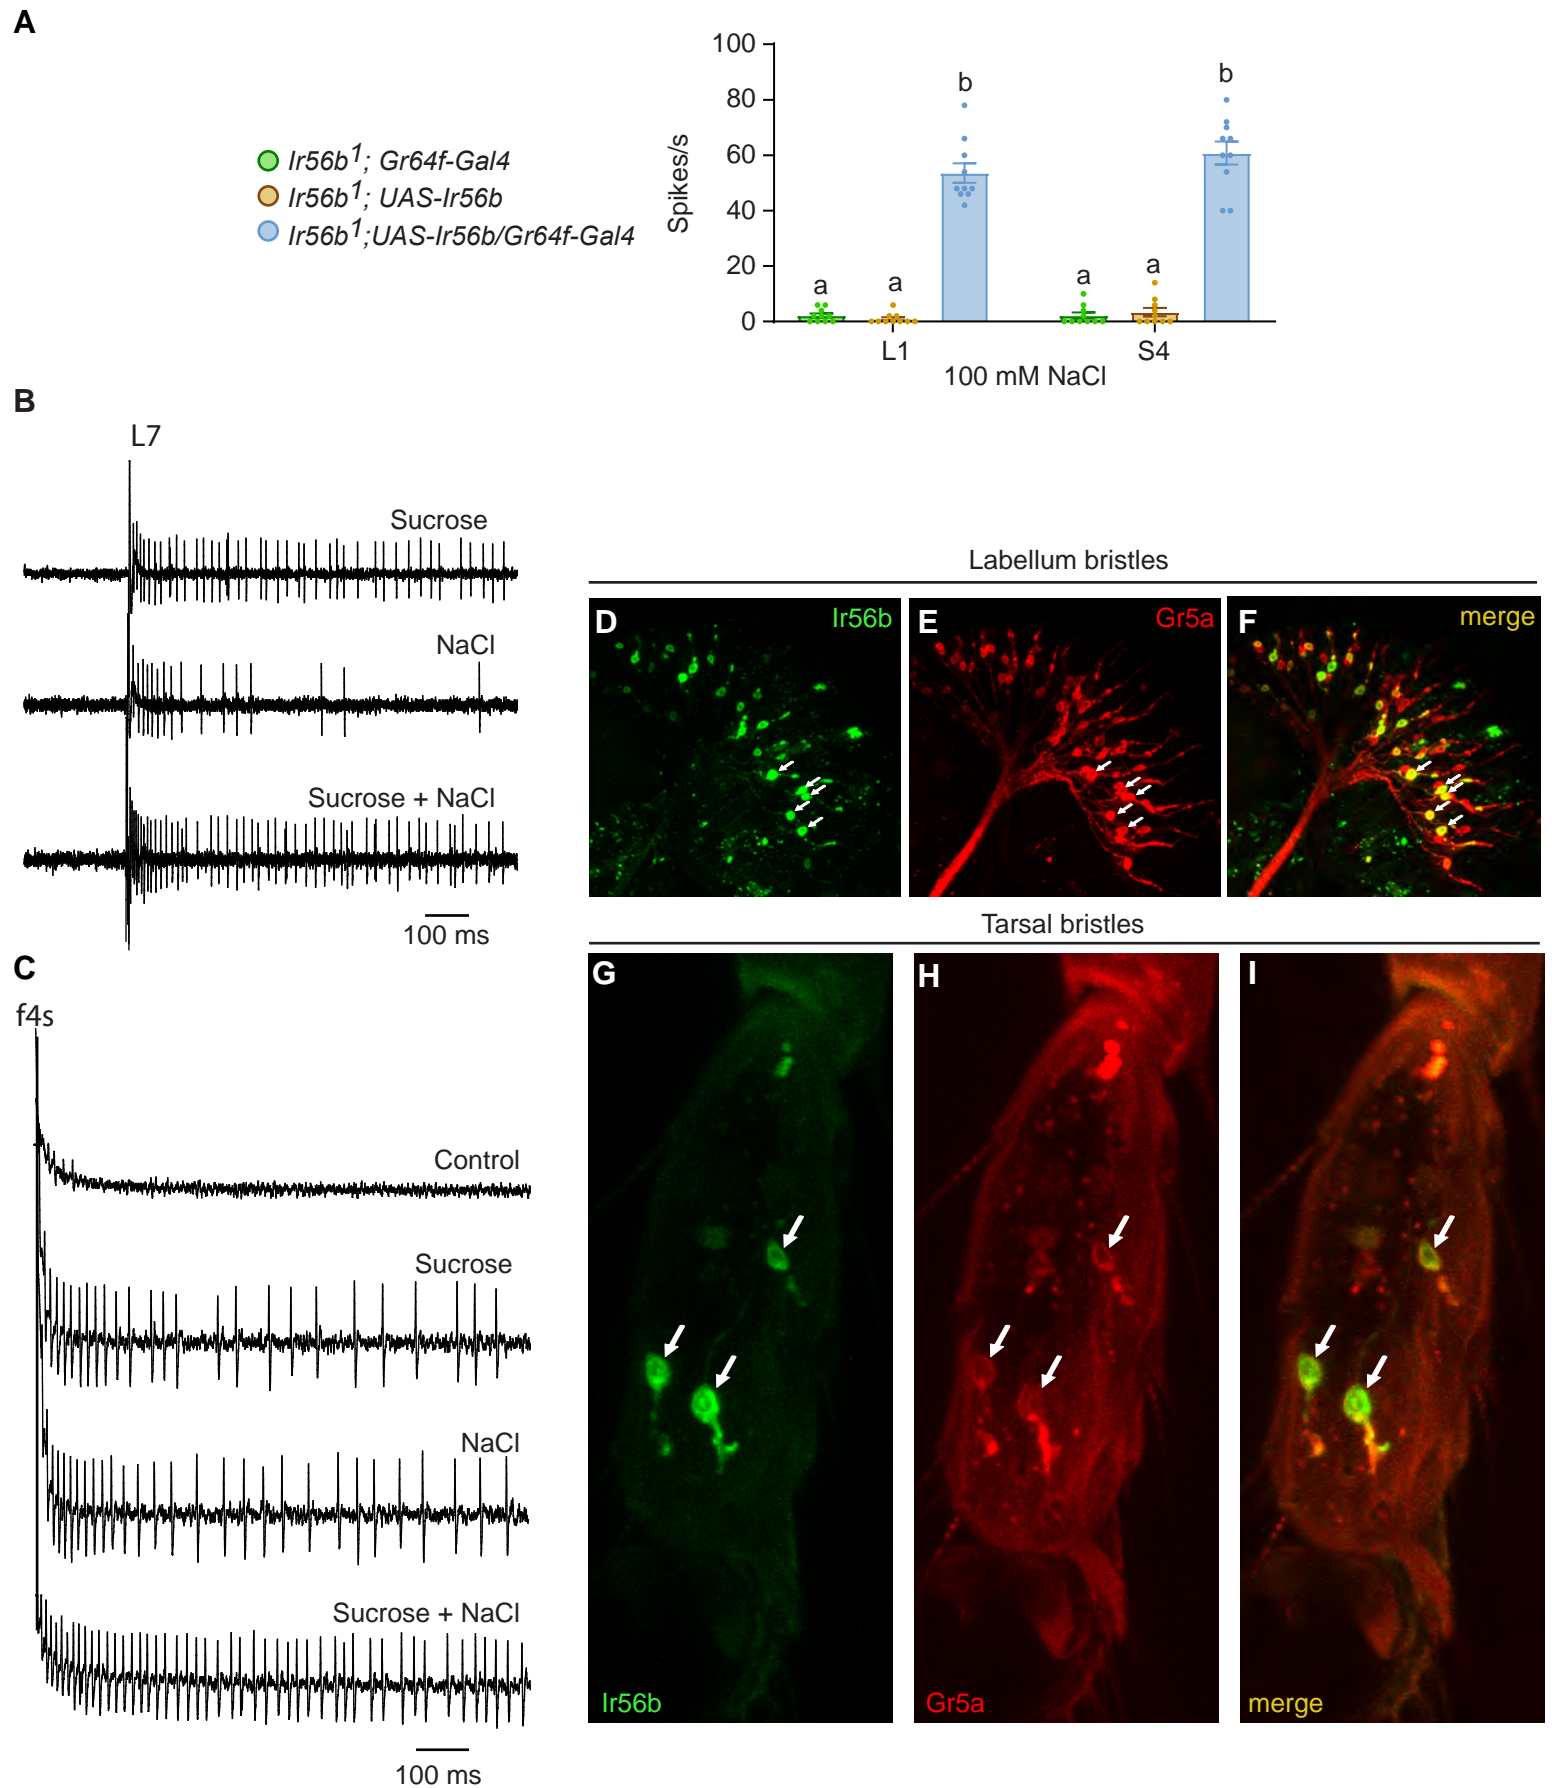

**Figure S3. IR56b is expressed in sugar neurons. Related to Figure 4.**

(A) Responses of L1 and S4 in the indicated genotypes to 100 mM NaCl. In this experiment a *Gr64f-Gal4* driver is used to express *UAS-Ir56b* in *IR56b* mutant sugar neurons. One-way ANOVA followed by Tukey's multiple comparison test;  $n = 6-11$ . Values indicated with different letters are significantly different.

(B) Recordings from L7 sensilla of the labellum in control flies presented with 10 mM sucrose, 10 mM NaCl, and a mixture of 10 mM sucrose and 10 mM NaCl. Sucrose, NaCl, and the mixture were all dissolved in 30 mM TCC.

(C) Sample traces of electrophysiological recordings from f4s sensilla of legs in control flies presented with diluent control (30 mM TCC), 50 mM sucrose, 50 mM NaCl, and a mixture of 50 mM NaCl and 50 mM sucrose.

(D-F) *Ir56a-GAL4* (green, GFP) is expressed in a subset of *Gr5a-LexA* (red, tandem-Tomato) neurons in the labellum. (G-I) *Ir56a-GAL4* is expressed in a subset of *Gr5a-LexA*-expressing neurons in the tarsal segments. Arrows indicate labelled neurons.

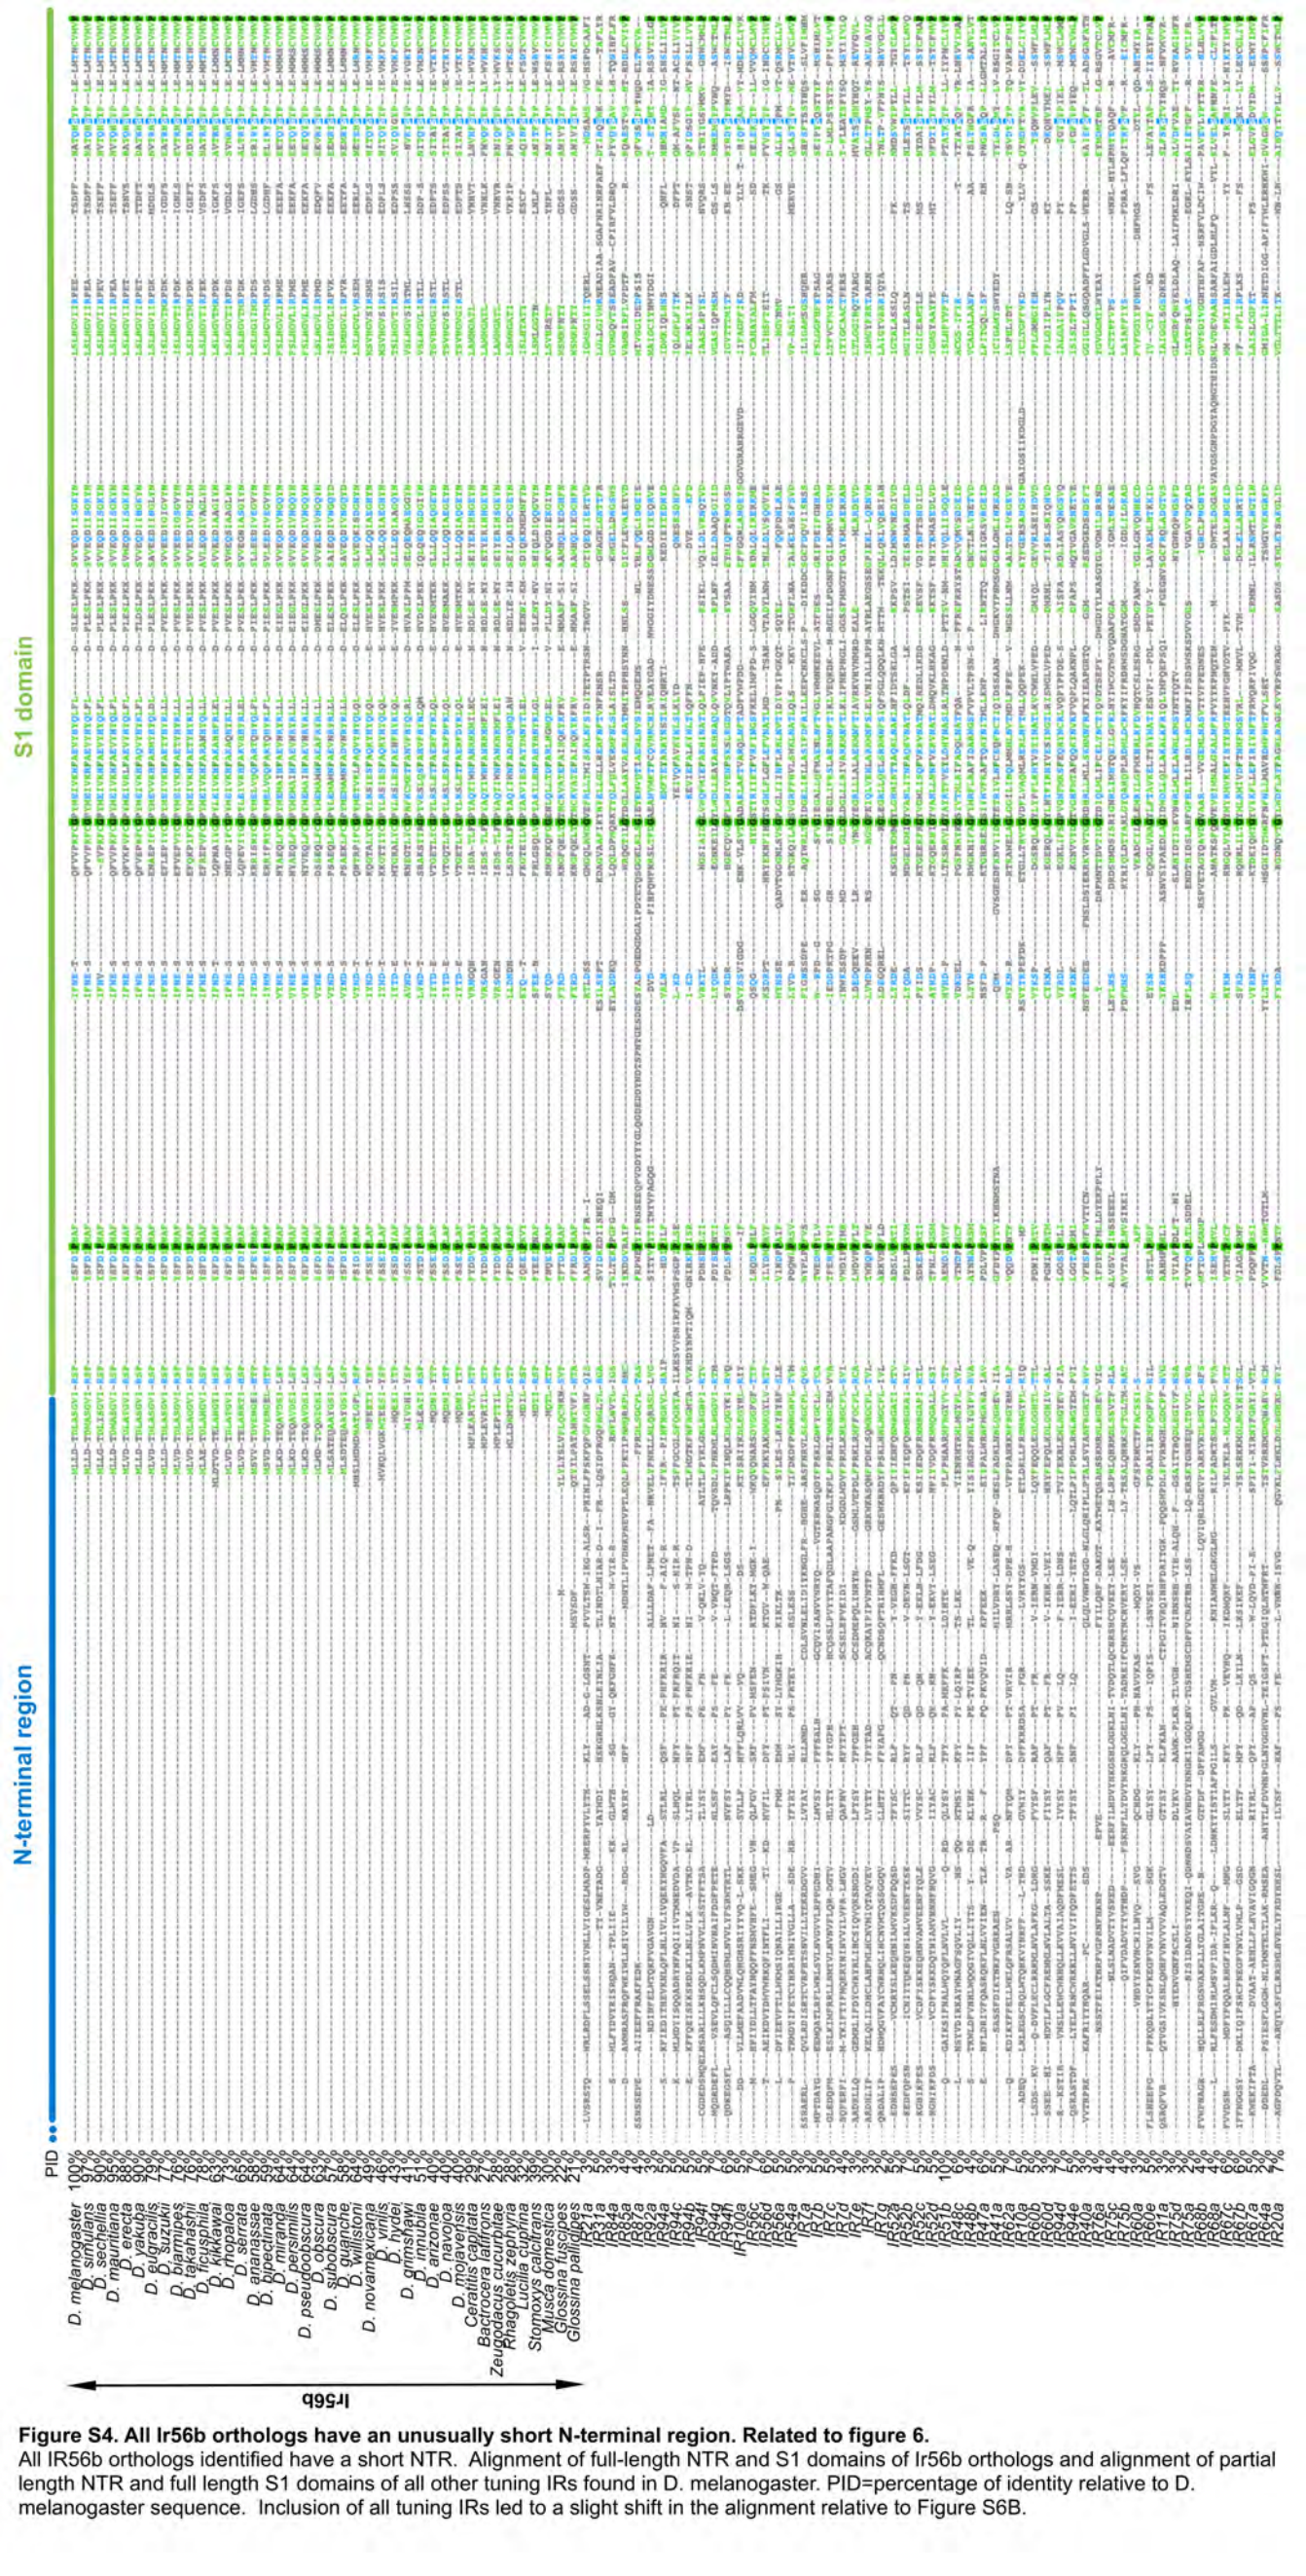

100% PID

N-terminal region

S1 domain

Ir56b

Figure S4. All Ir56b orthologs have an unusually short N-terminal region. Related to figure 6. All IR56b orthologs identified have a short NTR. Alignment of full-length NTR and S1 domains of Ir56b orthologs and alignment of partial length NTR and full length S1 domains of all other tuned IRs found in *D. melanogaster*. PID=percentage of identity relative to *D. melanogaster* sequence. Inclusion of all other IRs led to a slight shift in the alignment relative to Figure S6B.

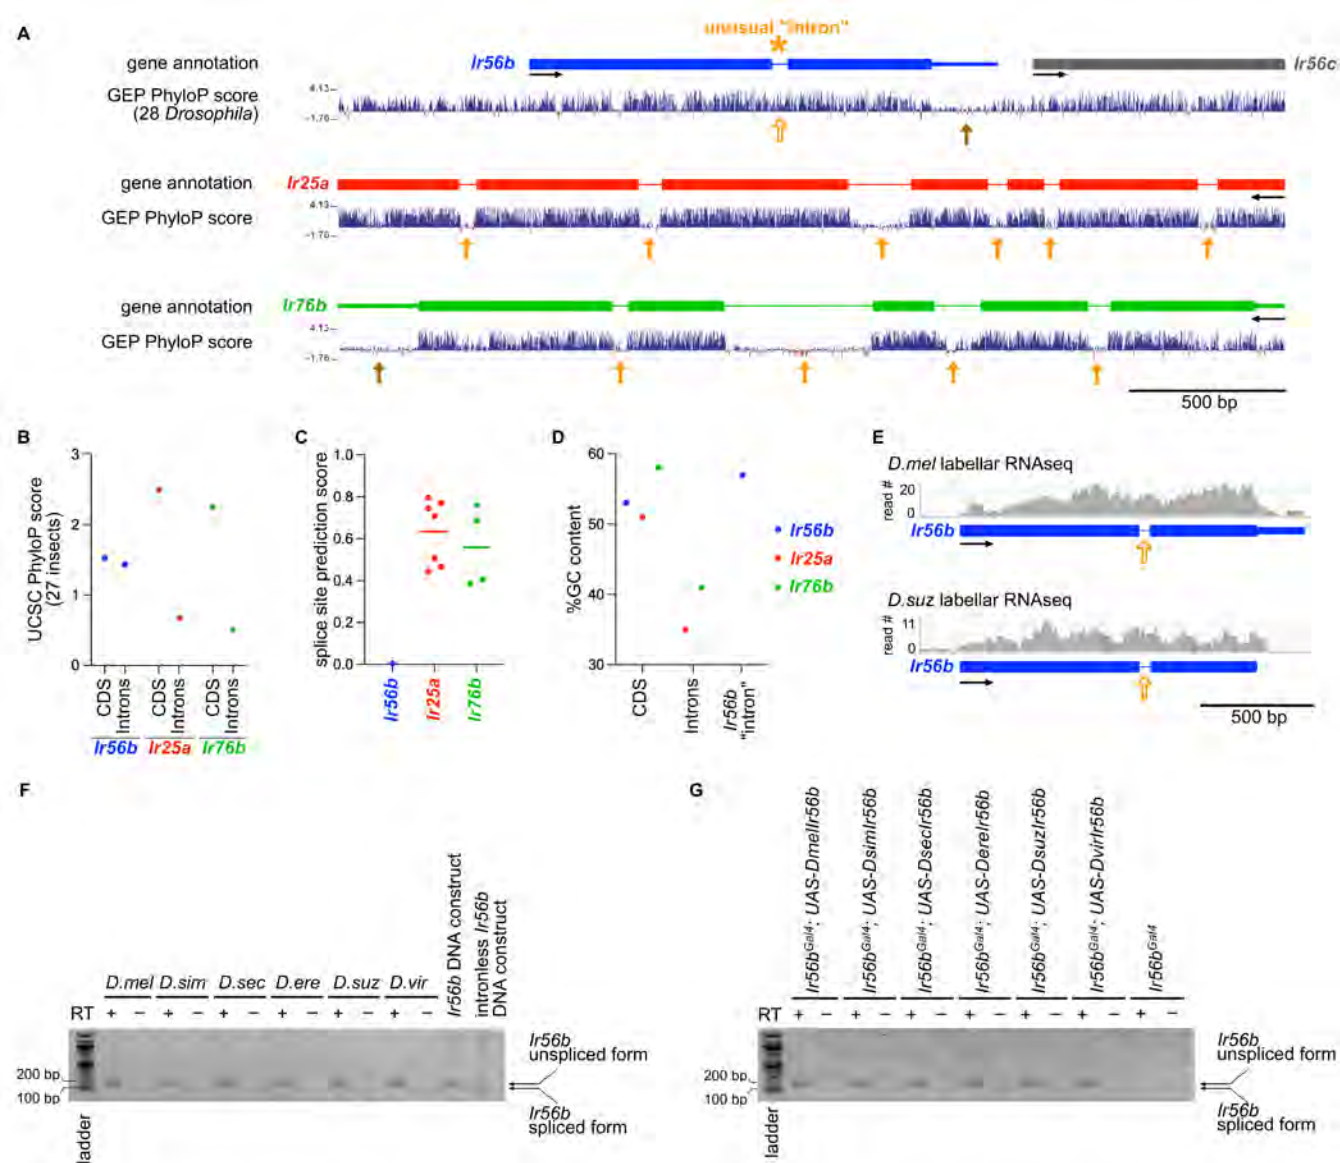

**Figure S5. The *Ir56b* gene encodes a single-exon transcript. Related to figure 6.**

(A) Genome annotation of *Ir56b*, from release 6.42. PhyloP score per nucleotide for *Ir56b*, *Ir25a*, and *Ir76b* genes; calculated from the alignment of 28 different *Drosophila* species. Plot obtained from GEP USCS genome browser Mirror at WUSTL (gander2.wustl.edu). Thick lines represent exons, lines of medium thickness represent untranslated regions, and thin lines represent introns. The phyloP score measures evolutionary conservation at individual alignment sites. It declines at introns (orange arrows) and untranslated regions (brown arrows), evidence of lower conservation relative to the coding regions. The annotated intron of *Ir56b* is indicated by an open orange arrow and an asterisk. In the case of *Ir56b*, the annotated intronic and exonic regions cannot be distinguished by the phyloP score. The scale is displayed on the bottom right and gene orientation is noted by a black arrow.

(B) Average phyloP score for *Ir56b*, *Ir25a*, and *Ir76b* genes; calculated from the alignment of 27 different insects. Data downloaded from USCS genome browser (<https://hgdownload.soe.ucsc.edu/downloads.html>). Unlike for *Ir25a* and *Ir76b*, the average phyloP score of the annotated *Ir56b* "intron" (1.43) is similar to the rest of the CDS (1.53).

(C) Average of 5' and 3' splice site prediction scores, as determined by NNSPLICE v0.9. Each dot represents the individual introns analyzed and the bar represents the average score. The *Ir56b* "intron" displays an unusually low splice site prediction score.

(D) GC content of *Ir56b*, *Ir25a*, and *Ir76b* exons and introns. Unlike other introns, the annotated *Ir56b* intron has a similar GC content to all exonic regions analyzed.

(E) *D. melanogaster* and *D. sukuzii* labellar RNAseq coverage of *Ir56b*. No reads derived from a splicing event were detected in either species. In *D. melanogaster*, one synonymous substitution was detected at position 915, C>T, relative to the reference genome, and is indicated by a red vertical line.

(F) RT-PCR analysis of *Ir56b* transcripts from labellar preparations of different species. As controls, we used DNA constructs that included or excluded the "intrinsic" region as a template for PCR. The "unspliced" amplicon is ~160bp long and the "spliced" amplicon is 110bp long.

(G) RT-PCR analysis of *Ir56b* transcripts from labella of *D. melanogaster* expressing various UAS-constructs.

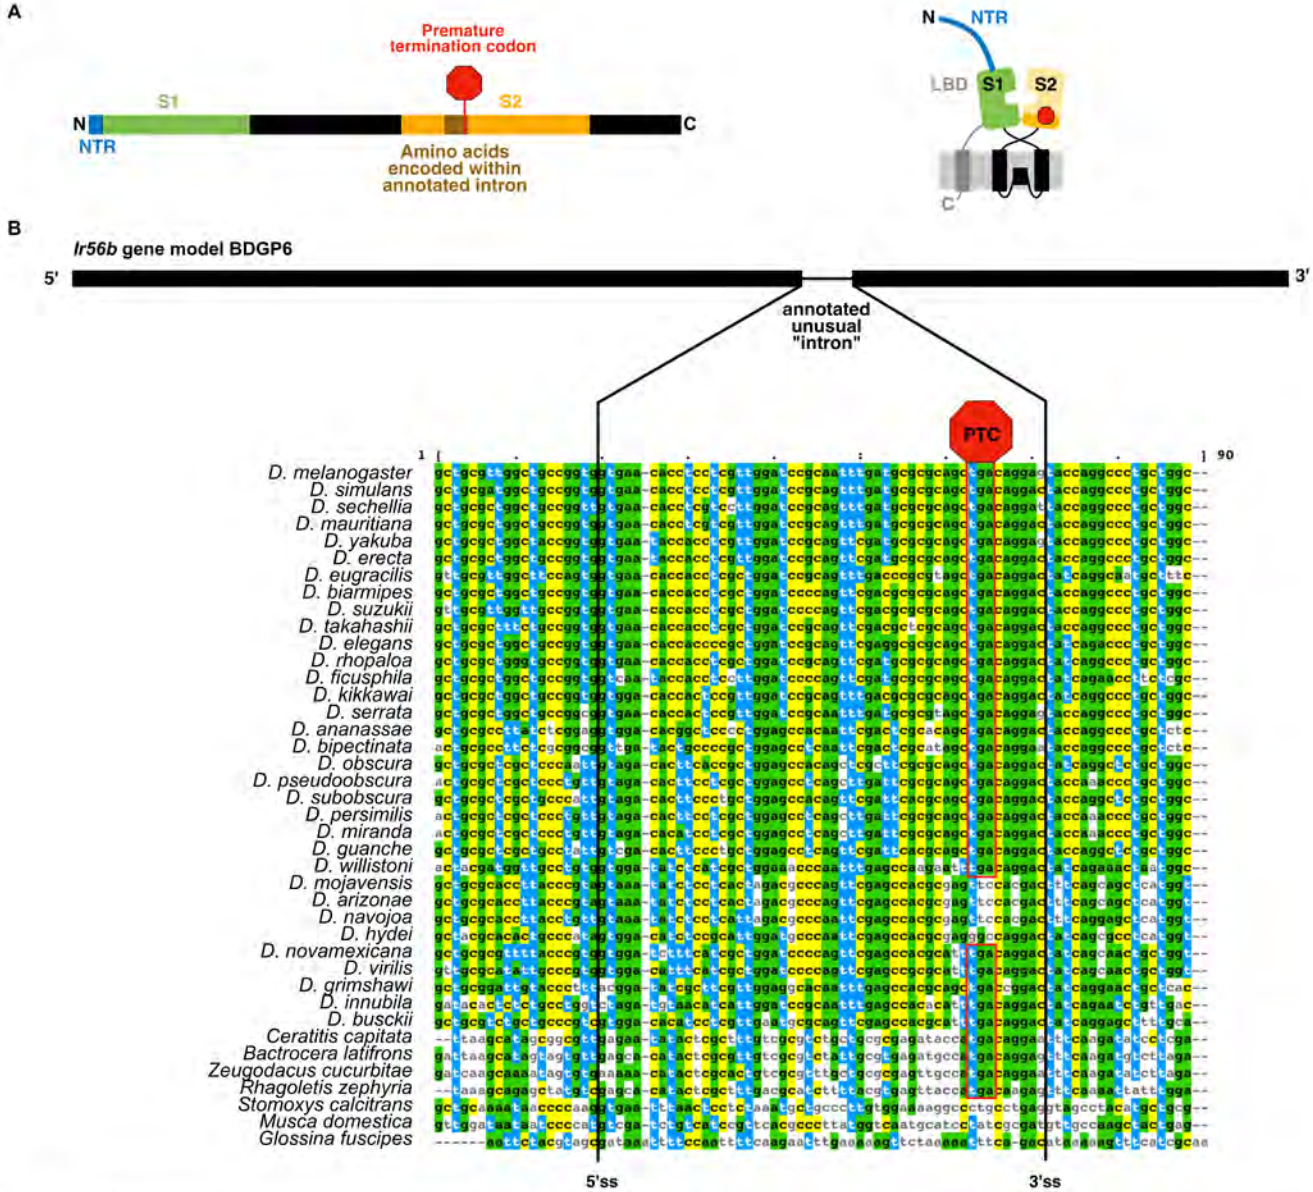

**Figure S6. Conserved premature termination codon in *Ir56b*. Related to figure 6.**

(A) Diagram of *Ir56b* protein in its linear form (left) and predicted structure (right) showing N-terminal region (NTR, blue), S1 domain (green), and S2 domain (orange). Part of the S2 domain is encoded within the annotated "intron" (brown), the region that contains the PTC. Without readthrough, a large fraction of the protein would be absent. Right panel adapted from Abuin et al. (2019).

(B) Gene model of *D. melanogaster Ir56b* (release 6.40) (top) and alignment of partial sequences of the *Ir56b* orthologous genes. This region includes the intron, delimited by black lines indicating the 5' and 3' splice sites (ss). The PTC is boxed in red.

| Ir   | Full length | NTR | S1 domain |
|------|-------------|-----|-----------|
| 25a  | 947         | 439 | 107       |
| 8a   | 936         | 376 | 126       |
| 93a  | 868         | 433 | 125       |
| 64a  | 859         | 309 | 113       |
| 21a  | 842         | 281 | 107       |
| 87a  | 796         | 331 | 151       |
| 40a  | 732         | 216 | 131       |
| 60a  | 716         | 243 | 126       |
| 68a  | 704         | 223 | 125       |
| 92a  | 678         | 245 | 120       |
| 75d  | 675         | 262 | 108       |
| 7b   | 655         | 211 | 105       |
| 41a  | 648         | 210 | 123       |
| 31a  | 648         | 206 | 115       |
| 76a  | 646         | 225 | 117       |
| 84a  | 644         | 224 | 113       |
| 11a  | 642         | 239 | 115       |
| 76b  | 636         | 81  | 109       |
| 68b  | 635         | 192 | 107       |
| 56d  | 632         | 215 | 104       |
| 75a  | 629         | 204 | 113       |
| 7c   | 625         | 214 | 110       |
| 75c  | 623         | 195 | 114       |
| 7f   | 621         | 227 | 110       |
| 7a   | 614         | 216 | 115       |
| 94e  | 611         | 199 | 101       |
| 10a  | 609         | 188 | 113       |
| 7e   | 608         | 211 | 99        |
| 62a  | 606         | 203 | 103       |
| 7g   | 606         | 201 | 116       |
| 85a  | 605         | 201 | 104       |
| 75b  | 605         | 179 | 123       |
| 94c  | 604         | 195 | 90        |
| 56a  | 603         | 202 | 102       |
| 100a | 603         | 178 | 108       |
| 48b  | 600         | 191 | 96        |
| 52a  | 599         | 186 | 105       |
| 52c  | 599         | 184 | 104       |
| 51b  | 597         | 194 | 104       |
| 52b  | 596         | 184 | 99        |
| 94a  | 595         | 201 | 82        |
| 7d   | 594         | 210 | 111       |
| 52d  | 594         | 184 | 104       |
| 47a  | 593         | 185 | 101       |
| 94d  | 593         | 181 | 100       |
| 94b  | 592         | 192 | 85        |
| 54a  | 586         | 185 | 101       |
| 67a  | 584         | 173 | 102       |
| 60b  | 577         | 178 | 101       |
| 60d  | 574         | 175 | 100       |
| 67b  | 574         | 172 | 100       |
| 67c  | 573         | 164 | 106       |
| 60e  | 572         | 185 | 100       |
| 56c  | 567         | 178 | 101       |
| 20a  | 563         | 187 | 105       |
| 48c  | 561         | 176 | 100       |
| 94h  | 559         | 183 | 104       |
| 94f  | 558         | 187 | 104       |
| 94g  | 545         | 177 | 103       |
| 56b  | 408         | 11  | 104       |

**Table S1. Length of all *D. melanogaster* Irs, related to Figure 6.** Total length is provided in the 2nd column; the estimated N-terminal region (NTR) length in the 3rd column; the estimated S1 domain length in the 4th column.

|                                  |     |                                                                                 |
|----------------------------------|-----|---------------------------------------------------------------------------------|
| Ir47a left Homology Arm          | fwd | GGCTTCTGCAACTGATCTATTC                                                          |
| Ir47a left Homology Arm          | rev | TCTAGATTTTTATGGCCTTTTGAAACTGAA                                                  |
| Ir47a right Homology Arm         | fwd | ATGCGCTCTTCATATTCGTGGAAGTTGTCGTGG                                               |
| Ir47a right Homology Arm         | rev | CTAAGCTCTTCAGACATTATGGGCCAGGGTTATGG                                             |
| Ir56b left Homology Arm          | fwd | GTGCCGTCGAAACCCTAAA                                                             |
| Ir56b left Homology Arm          | rev | TCTAGATTTATGGCCGACTACGGATTG                                                     |
| Ir56b right Homology Arm         | fwd | ATGCGCTCTTCATATCAAGTGGAAATATCATTGTTCTC                                          |
| Ir56b right Homology Arm         | rev | CTAAGCTCTTCAGACGGTCAGAAGGTCGTAGATTG                                             |
| Ir47a guide RNA                  | fwd | GCGGCCCGGGTTCGATTCCCGGCCGATGCATAGCCT<br>TTTGTGTATTTCATCGGTTTTAGAGCTAGAAATAGCAAG |
| Ir47a guide RNA                  | rev | ATTTTAACTTGCTATTTCTAGCTCTAAAACCATTTTTTA<br>TGGCCTTTTGAATGCACCAGCCGGGAATCGAACCC  |
| Ir56b guide RNA                  | fwd | GCGGCCCGGGTTCGATTCCCGGCCGATGCAGCCATA<br>AAATGCTGCTTGACAGTTTTAGAGCTAGAAATAGCAAG  |
| Ir56b guide RNA                  | rev | ATTTTAACTTGCTATTTCTAGCTCTAAAACCTTGTTAGT<br>AATCGTAGCACTTGCACCAGCCGGGAATCGAACCC  |
| Gal4 core promoter               | fwd | cggccataaaTCGTTTCAGCTTTCTTGTAC                                                  |
| Gal4 core promoter               | rev | atggttggtgaTCTAGAAGCCAACGTGTATC                                                 |
| Ir56b donor plasmid              | fwd | ggcttctagaTCCACAACATCCCGTTTAC                                                   |
| Ir56b donor plasmid              | rev | agctgaacgaTTTATGGCCGACTACGGATTG                                                 |
| Ir56b UAS <i>D. mel</i>          | fwd | actctgaataggggaattgggGTAGTCGGCCATAAAAATG                                        |
| Ir56b UAS <i>D. mel</i>          | rev | ggttccttcacaaagatcctGTAAGCCAGGTTAATTTTTATG                                      |
| Ir56b UAS <i>D. sim / D. sec</i> | fwd | actctgaataggggaattgggGTAGTCGGCCCTAAAATG                                         |
| Ir56b UAS <i>D. sim / D. sec</i> | rev | ggttccttcacaaagatcctCCACGATTTGTAAGCCAG                                          |
| Ir56b UAS <i>D. ere</i>          | fwd | actctgaataggggaattgggGTAGTCGGCCCTAAAATG                                         |
| Ir56b UAS <i>D. ere</i>          | rev | ggttccttcacaaagatcctCTGAGACCTATTCAAAGTTATT<br>AAATC                             |
| Ir56b UAS <i>D. suz</i>          | fwd | actctgaataggggaattgggATAGTCGACCCCAAATG                                          |
| Ir56b UAS <i>D. suz</i>          | rev | ggttccttcacaaagatcctTGCTAAAACAATTCCTTGAATTG                                     |
| Ir56b UAS <i>D. vir</i>          | fwd | actctgaataggggaattgggACTTGCAGCACGAAATGG                                         |
| Ir56b UAS <i>D. vir</i>          | rev | ggttccttcacaaagatcctTAATTTGACTGATATTTATACT<br>ATAGTGAAG                         |
| UAS Ir56b $\Delta 51$            | fwd | TACCAGGCCCTGCTGGCG                                                              |
| UAS Ir56b $\Delta 51$            | rev | CACCGGCAGCCAACGCAG                                                              |
| UAS Ir56b $\Delta 462$           | fwd | TAACAAGTGGAAATATCATTGTTCTCTATTATC                                               |
| UAS Ir56b $\Delta 462$           | rev | TCAGCTGCGGCATCAA                                                                |



|                                            |     |                         |
|--------------------------------------------|-----|-------------------------|
| UAS Ir56b TTC                              | fwd | GCGCGCAGCTtcCAGGAGTACC  |
| UAS Ir56b TTC                              | rev | ATCAAATTGCGGATCCAACG    |
| Ir56b <i>D. mel</i> – <i>D. ere</i> RT-PCR | fwd | TCGAGACTGCGCATCGTTATC   |
| Ir56b <i>D. mel</i> – <i>D. ere</i> RT-PCR | rev | GTGACCACATAGGCGTAGGAAC  |
| Ir56b <i>D. suz</i> RT-PCR                 | fwd | AAAGCTGCGAATCGTCATCCA   |
| Ir56b <i>D. suz</i> RT-PCR                 | rev | GCATCCTGGGTCACCACATAG   |
| Ir56b <i>D. vir</i> RT-PCR                 | fwd | TATACCGGATACGCTGCTGGA   |
| Ir56b <i>D. vir</i> RT-PCR                 | rev | CACGCATCCTGTGTAACCACATA |

**Table S2. List of primers. Related to Figures 2-6.**
